# Supplementary material for: Tropical Isognomonids in the Mediterranean Sea: When the West Atlantic met the Indo-Pacific Region in the South Aegean Sea
Source: Research Square preprint supplement (doi:10.21203/rs.3.rs-4269231/v2), 2024-08-15
Supplement: Supplementary file 1 [file cd7d24319e7e44fa9b5619de.xlsx]

## Sheet: Supplementary Table A
Table A . Identification in BLAST
A/A	Code	Location	Water column position	Date	Gene	Identification in BLAST	%			Sequence
1	IB1	Alimia cove	Into and around rock crevices	2022-07-01	28S	Isognomon bicolor voucher AMNH: 307896; Isognomon ephippium voucher AMNH:319336; Isognomon spathulata voucher AMNH:319257	100; 98.51; 98.42			CGAGTGAAGCGGGAAGAGCCCAGCACCGAATCCCTCGGCCTCGAGTCGCTGGGAACTGTGGTGTTTGGGACGTCTATTGCGGTGGGGTACGGGTGCCCAAGTCCTCCTGATCGGGGCCTCTCCCAAAGCGGGTGTCAGGCCTTTACAGGCACTCGTCCCTACTGCTAAGAACGTCCTCGGAGTCGGGTTGTTTGAGAATGCAGCCCAAAGTGGGTGGTAAACTCCATCTAAGGCTAAATACTGGCACGAGTCCGATAGCGGACAAGTACCGTGAGGGAAAGTTGAAAAGAACTTTGAAGAGAGAGTTCAAGAGTACGTGAAACCGCTTAGAGGTAAACGGGTGGACCCGCAAAGTCGGCCCGGGGAATTCAGCTCTCTGCCTGTCGGCGGGCGGCGCGG…
	IB1(COI)	Alimia cove	Into and around rock crevices	2021-07-01	COI	Isognomon bicolor	98.50			ATGCGATAATGGGAACTAGATTTAGGTTTATTATTCGTATGGAGCTTCGTCGTCCTGGCATGACTTTGGACAGTGGTCAGCTGTATAACAGCCTAGTAACTGCACATGCACTGGTGATGATTTTTTTCTTTGTAATGCCAGTTTTAATCGGAGGGTTTGGGAACTGACTTGTGCCTCTGATGTTGGGGTCTCCAGACATGCAGTTTCCTCGTCTTAATAACTTTAGGTTCTGGGTTTTGCCGTGAGCACTAGAGTTGGTGGGGATAAGAGCGTTATGTGAGGAGGGTTCAGGGACAGGGTGGACTTTGTATCCGCCCCTGTCCACTTATACGTTTCATGGGAAAACAGTGGATTTAGCTATTTGTGGTTTGCATTTAGCGGGGATTGGTTCAATTTTTG…
2	IB2	Alimia cove	Into and around rock crevices	2022-07-01	28S	Isognomon bicolor voucher AMNH: 307896; Isognomon ephippium voucher AMNH:319336; Isognomon spathulata voucher AMNH:319257	100; 98.51; 98.42			CGAGTGAAGCGGGAAGAGCCCAGCACCGAATCCCTCGGCCTCGAGTCGCTGGGAACTGTGGTGTTTGGGACGTCTATTGCGGTGGGGTACGGGTGCCCAAGTCCTCCTGATCGGGGCCTCTCCCAAAGCGGGTGTCAGGCCTTTACAGGCACTCGTCCCTACTGCTAAGAACGTCCTCGGAGTCGGGTTGTTTGAGAATGCAGCCCAAAGTGGGTGGTAAACTCCATCTAAGGCTAAATACTGGCACGAGTCCGATAGCGGACAAGTACCGTGAGGGAAAGTTGAAAAGAACTTTGAAGAGAGAGTTCAAGAGTACGTGAAACCGCTTAGAGGTAAACGGGTGGACCCGCAAAGTCGGCCCGGGGAATTCAGCTCTCTGCCTGTCGGCGGGCGGCGCGG…
3	IB3	Alimia cove	Into and around rock crevices	2021-07-01	28S	Isognomon bicolor voucher AMNH: 307896; Isognomon ephippium voucher AMNH:319336; Isognomon spathulata voucher AMNH:319257	100; 98.51; 98.42			CGAGTGAAGCGGGAAGAGCCCAGCACCGAATCCCTCGGCCTCGAGTCGCTGGGAACTGTGGTGTTTGGGACGTCTATTGCGGTGGGGTACGGGTGCCCAAGTCCTCCTGATCGGGGCCTCTCCCAAAGCGGGTGTCAGGCCTTTACAGGCACTCGTCCCTACTGCTAAGAACGTCCTCGGAGTCGGGTTGTTTGAGAATGCAGCCCAAAGTGGGTGGTAAACTCCATCTAAGGCTAAATACTGGCACGAGTCCGATAGCGGACAAGTACCGTGAGGGAAAGTTGAAAAGAACTTTGAAGAGAGAGTTCAAGAGTACGTGAAACCGCTTAGAGGTAAACGGGTGGACCCGCAAAGTCGGCCCGGGGAATTCAGCTCTCTGCCTGTCGGCGGGCGGCGCGG…
4	IB4	Alimia cove	Into and around rock crevices	2022-07-01	28S	Isognomon bicolor voucher AMNH: 307896; Isognomon ephippium voucher AMNH:319336; Isognomon spathulata voucher AMNH:319257	100; 98.51; 98.42			CGAGTGAAGCGGGAAGAGCCCAGCACCGAATCCCTCGGCCTCGAGTCGCTGGGAACTGTGGTGTTTGGGACGTCTATTGCGGTGGGGTACGGGTGCCCAAGTCCTCCTGATCGGGGCCTCTCCCAAAGCGGGTGTCAGGCCTTTACAGGCACTCGTCCCTACTGCTAAGAACGTCCTCGGAGTCGGGTTGTTTGAGAATGCAGCCCAAAGTGGGTGGTAAACTCCATCTAAGGCTAAATACTGGCACGAGTCCGATAGCGGACAAGTACCGTGAGGGAAAGTTGAAAAGAACTTTGAAGAGAGAGTTCAAGAGTACGTGAAACCGCTTAGAGGTAAACGGGTGGACCCGCAAAGTCGGCCCGGGGAATTCAGCTCTCTGCCTGTCGGCGGGCGGCGCGG…
5	IB5	Alimia cove	Into and around rock crevices	2021-07-01	28S	Isognomon bicolor voucher AMNH: 307896; Isognomon ephippium voucher AMNH:319336; Isognomon spathulata voucher AMNH:319257	100; 98.51; 98.42			CGAGTGAAGCGGGAAGAGCCCAGCACCGAATCCCTCGGCCTCGAGTCGCTGGGAACTGTGGTGTTTGGGACGTCTATTGCGGTGGGGTACGGGTGCCCAAGTCCTCCTGATCGGGGCCTCTCCCAAAGCGGGTGTCAGGCCTTTACAGGCACTCGTCCCTACTGCTAAGAACGTCCTCGGAGTCGGGTTGTTTGAGAATGCAGCCCAAAGTGGGTGGTAAACTCCATCTAAGGCTAAATACTGGCACGAGTCCGATAGCGGACAAGTACCGTGAGGGAAAGTTGAAAAGAACTTTGAAGAGAGAGTTCAAGAGTACGTGAAACCGCTTAGAGGTAAACGGGTGGACCCGCAAAGTCGGCCCGGGGAATTCAGCTCTCTGCCTGTCGGCGGGCGGCGCGG…
6	IB6	Alimia cove	Into and around rock crevices	2022-07-01	28S	Isognomon bicolor voucher AMNH: 307896; Isognomon ephippium voucher AMNH:319336; Isognomon spathulata voucher AMNH:319257	100; 98.51; 98.42			CGAGTGAAGCGGGAAGAGCCCAGCACCGAATCCCTCGGCCTCGAGTCGCTGGGAACTGTGGTGTTTGGGACGTCTATTGCGGTGGGGTACGGGTGCCCAAGTCCTCCTGATCGGGGCCTCTCCCAAAGCGGGTGTCAGGCCTTTACAGGCACTCGTCCCTACTGCTAAGAACGTCCTCGGAGTCGGGTTGTTTGAGAATGCAGCCCAAAGTGGGTGGTAAACTCCATCTAAGGCTAAATACTGGCACGAGTCCGATAGCGGACAAGTACCGTGAGGGAAAGTTGAAAAGAACTTTGAAGAGAGAGTTCAAGAGTACGTGAAACCGCTTAGAGGTAAACGGGTGGACCCGCAAAGTCGGCCCGGGGAATTCAGCTCTCTGCCTGTCGGCGGGCGGCGCGG…
7	IB7	Pontamos beach	Into rock crevices	2021-07-01	28S	Isognomon bicolor voucher AMNH: 307896; Isognomon ephippium voucher AMNH:319336; Isognomon spathulata voucher AMNH:319257	100; 98.43; 98.33			AACTGTGGTGTTTGGGACGTCTATTGCGGTGGGGTACGGGTGCCCAAGTCCTCCTGATCGGGGCCTCTCCCAAAGCGGGTGTCAGGCCTTTACAGGCACTCGTCCCTACTGCTAAGAACGTCCTCGGAGTCGGGTTGTTTGAGAATGCAGCCCAAAGTGGGTGGTAAACTCCATCTAAGGCTAAATACTGGCACGAGTCCGATAGCGGACAAGTACCGTGAGGGAAAGTTGAAAAGAACTTTGAAGAGAGAGTTCAAGAGTACGTGAAACCGCTTAGAGGTAAACGGGTGGACCCGCAAAGTCGGCCCGGGGAATTCAGCTCTCTGCCTGTCGGCGGGCGGCGCGGTCGGGATCCGTCAAGGACTCGCTGCGTCGTCGCGGTCGGCGGCGGGGTGTGCA…
8	IB8	Pontamos beach	Into rock crevices	2021-07-01	28S	Isognomon bicolor voucher AMNH: 307896; Isognomon ephippium voucher AMNH:319336; Isognomon spathulata voucher AMNH:319257	100; 98.51; 98.42			CGAGTGAAGCGGGAAGAGCCCAGCACCGAATCCCTCGGCCTCGAGTCGCTGGGAACTGTGGTGTTTGGGACGTCTATTGCGGTGGGGTACGGGTGCCCAAGTCCTCCTGATCGGGGCCTCTCCCAAAGCGGGTGTCAGGCCTTTACAGGCACTCGTCCCTACTGCTAAGAACGTCCTCGGAGTCGGGTTGTTTGAGAATGCAGCCCAAAGTGGGTGGTAAACTCCATCTAAGGCTAAATACTGGCACGAGTCCGATAGCGGACAAGTACCGTGAGGGAAAGTTGAAAAGAACTTTGAAGAGAGAGTTCAAGAGTACGTGAAACCGCTTAGAGGTAAACGGGTGGACCCGCAAAGTCGGCCCGGGGAATTCAGCTCTCTGCCTGTCGGCGGGCGGCGCGG…
9	IL1	Alimia cove	Under stones	2022-07-01	28S	Isognomon legumen voucher BivAToL-425; I. legumen Japan; Isognomon sp. Voucher AMNH:31923	99.90; 99.90; 99.90			CGAGTGAAGCGGGAAGAGCCCAGCACCGAATCCCTCGGCCTCGCGTCGCTGGGAACTGTGGTGTTTGGGACGTCTACTGCGGTGGGGTACGGGTGCCCAAGTCCTCCTGATCGGGGCCTCTCCCATAGCGGGTGTCAGGCCTTTACAGGCACTCGTCCCTTCTGCTAAGAACGTCCTTGGAGTCGGGTTGTTTGAGAATGCAGCCCAAAGTGGGTGGTAAACTCCATCTAAGGCTAAATACTGGCACGAGTCCGATAGCGGACAAGTACCGTGAGGGAAAGTTGAAAAGAACTTTGAAGAGAGAGTTCAAGAGTACGTGAAACCGCTTAGAGGTAAACGGGTGGACCCGCAAAGTCGGCCCGGGGAATTCAGCTCTCTGCCTGTCGGCGGGCGGTGCGG…
	IL1(COI)	Alimia cove	Under stones	2022-07-01	COI	Isognomon legumen voucher BivAToL-425	99.79			TATGATAGGTACTGGCTTCAGCTTTGTAATCCGTATGGAGTTGCGGCGGCCAGGGATGACGCTGGGGAGGAGTCACTTCTATAACACTGTAGTGACTGCTCATGCGTTAATTATGATTTTTTTCTTTGTTATGCCAGTCTTAATTGGGGGGTTTGGTAACTGGCTGGTCCCCCTAATGCTGGGCGCCCCTGACATGCAGTTCCCTCGGGTGAATAATTTTAGCTTTTGGGTATTGCCTTGGGCGTTAGATTTGTTGGTTGTTTCGATTTTAACAGAAGGGGGTACGGGGACTGGCTGGACTCTGTATCCTCCCCTTTCTACTTATGTATATCATGGGAAAAGGGTAGACCTAGCTGTCTTTAGGCTTCATTTGGCCGGGATTGGATCCATTTTTGCTTC…
10	IL2	Alimia cove	Under stones	2022-07-01	28S	Isognomon legumen voucher BivAToL-425; I. legumen Japan; Isognomon sp. Voucher AMNH:31923	99.90; 99.90; 99.90			CGAGTGAAGCGGGAAGAGCCCAGCACCGAATCCCTCGGCCTCGCGTCGCTGGGAACTGTGGTGTTTGGGACGTCTACTGCGGTGGGGTACGGGTGCCCAAGTCCTCCTGATCGGGGCCTCTCCCATAGCGGGTGTCAGGCCTTTACAGGCACTCGTCCCTTCTGCTAAGAACGTCCTTGGAGTCGGGTTGTTTGAGAATGCAGCCCAAAGTGGGTGGTAAACTCCATCTAAGGCTAAATACTGGCACGAGTCCGATAGCGGACAAGTACCGTGAGGGAAAGTTGAAAAGAACTTTGAAGAGAGAGTTCAAGAGTACGTGAAACCGCTTAGAGGTAAACGGGTGGACCCGCAAAGTCGGCCCGGGGAATTCAGCTCTCTGCCTGTCGGCGGGCGGTGCGG…
11	IL3	Pontamos beach	Under stones	2022-07-01	28S	Isognomon sp. A IT-2010 voucher/Isognomon legumen Japan/Isognomon radiatus voucher AMNH:305142	100; 99.90; 98.91			CGAGTGAAGCGGGAAGAGCCCAGCACCGAATCCCTCGGCCTCGCGTCGCTGGGAACTGTGGTGTTTGGGACGTCTACTGCGGTGGGGTACGGGTGCCCAAGTCCTCCTGATCGGGGCCTCTCCCATAGCGGGTGTCAGGCCTTTACAGGCACTCGTCCCTTCTGCTAAGAACGTCCTTGGAGTCGGGTTGTTTGAGAATGCAGCCCAAAGTGGGTGGTAAACTCCATCTAAGGCTAAATACTGGCACGAGTCCGATAGCGGACAAGTACCGTGAGGGAAAGTTGAAAAGAACTTTGAAGAGAGAGTTCAAGAGTACGTGAAACCGCTTAGAGGTAAACGGGTGGACCCGCAAAGTCGGCCCGGGGAATTCAGCTCTCTGCCTGTCGGCGGGCGGTGCGG…
12	IL4	Alimia cove	Under stones	2022-07-01	28S	Isognomon legumen voucher BivAToL-425; I. legumen Japan; Isognomon sp. Voucher AMNH:31923	99.90; 99.90; 99.90			CGAGTGAAGCGGGAAGAGCCCAGCACCGAATCCCTCGGCCTCGCGTCGCTGGGAACTGTGGTGTTTGGGACGTCTACTGCGGTGGGGTACGGGTGCCCAAGTCCTCCTGATCGGGGCCTCTCCCATAGCGGGTGTCAGGCCTTTACAGGCACTCGTCCCTTCTGCTAAGAACGTCCTTGGAGTCGGGTTGTTTGAGAATGCAGCCCAAAGTGGGTGGTAAACTCCATCTAAGGCTAAATACTGGCACGAGTCCGATAGCGGACAAGTACCGTGAGGGAAAGTTGAAAAGAACTTTGAAGAGAGAGTTCAAGAGTACGTGAAACCGCTTAGAGGTAAACGGGTGGACCCGCAAAGTCGGCCCGGGGAATTCAGCTCTCTGCCTGTCGGCGGGCGGTGCGG…
13	IL5	Pontamos beach	On rocky bottom	2022-07-01	28S	Isognomon legumen voucher BivAToL-425; I. legumen Japan; Isognomon sp. Voucher AMNH:31923	99.90; 99.90; 99.90			CGAGTGAAGCGGGAAGAGCCCAGCACCGAATCCCTCGGCCTCGCGTCGCTGGGAACTGTGGTGTTTGGGACGTCTACTGCGGTGGGGTACGGGTGCCCAAGTCCTCCTGATCGGGGCCTCTCCCATAGCGGGTGTCAGGCCTTTACAGGCACTCGTCCCTTCTGCTAAGAACGTCCTTGGAGTCGGGTTGTTTGAGAATGCAGCCCAAAGTGGGTGGTAAACTCCATCTAAGGCTAAATACTGGCACGAGTCCGATAGCGGACAAGTACCGTGAGGGAAAGTTGAAAAGAACTTTGAAGAGAGAGTTCAAGAGTACGTGAAACCGCTTAGAGGTAAACGGGTGGACCCGCAAAGTCGGCCCGGGGAATTCAGCTCTCTGCCTGTCGGCGGGCGGTGCGG…
	IL5(COI)	Pontamos beach	On rocky bottom	2022-07-01	COI	Isognomon legumen voucher BivAToL-425	99.24			TATGATAGGTACTGTCTTTAGCTTTGTAATCCGTATGGAGTTGCGGCGGCCAGGGATGACGCTGGGGAGGAGTCACTTCTATAACACTGTAGTGACTGCTCATGCGTTAATTATGATTTTTTTCTTTGTTATGCCAGTCTTAATTGGGGGGTTTGGTAACTGGCTGGTCCCCCTAATGCTGGGCGCCCCTGACATGCAGTTCCCTCGGGTGAATAATTTTAGCTTTTGGGTATTGCCTTGGGCGTTAGATTTGTTGGTTGTTTC

## Sheet: Supplementary Table 1
Species used for phylogenetic analyses in this study. Accession numbers originate from from existing reference sequences from GenBank.
A/A	Species	COI	28S	16S
1	Isognomon acutirostris	NA	AB594439, AB594440	NA
2	Isognomon alatus	KP455064, KP455069	HQ329446, KC429426	KC429251, HQ329405
3	Isognomon australicus	PP054330	NA	NA
4	Isognomon bicolor	PP054325, PP054326	HQ329447	HQ329406, OK104096, OK104097
5	Isognomon californicum	MW284814	HQ329448	NA
6	Isognomon ephippium	KY081310, MW339757	AB594430	KY081325
7	Isognomon cf. ephippium	NA	HQ329450, HQ329456, HQ329458	HQ329407
8	Isognomon isognomum	MN608263, MN608265	HQ329451, HQ329451	NA
9	Isognomon legumen	MT802137, MW284806, MW284808, MW284809	AB102761, AJ307551	NA
10	Isognomon nucleus	MN608274	NA	NA
11	Isognomon perna	MW284794, MW284811	AB594433, AB594435	NA
12	Isognomon radiatus	NA	HQ329453	HQ329408
13	Isognomon recognitus	KT317609, KT317610	NA	KT317424, KT317427
14	Isognomon spathulata	NA	HQ329463	NA
15	Isognomon sp.	NA	HQ329460, HQ329461	HQ329409
16	Pinctada maxima	AB259165	AB214465	AB214435
17	Magallana gigas	FJ717608	KX345723	AF280611

## Sheet: Suplementary Table 2
Information and Blast results from all specimens used in this study.
A/A	Code	Link to Figure 2	Sampling Site	Date	Substrate	Gene	BLAST Identification	%	Accession Number
1	IB1	a1	Alimia cove	2022-07-01	Into and around rock crevices	COI	Isognomon bicolor	100	PP906093
2	IB2	a2	Alimia cove	2022-07-01	Into and around rock crevices	COI	Isognomon bicolor	100	PP906094
3	IB3	a3	Alimia cove	2021-07-01	Into and around rock crevices	COI	Isognomon bicolor	100	PP906095
4	IB4	a4	Alimia cove	2022-07-01	Into and around rock crevices	COI	Isognomon bicolor	100	PP906096
5	IB5	a5	Alimia cove	2021-07-01	Into and around rock crevices	COI	Isognomon bicolor	100	PP906097
6	IB6	a6	Alimia cove	2022-07-01	Into and around rock crevices	COI	Isognomon bicolor	100	PP906098
7	IB7	a7	Pontamos beach	2021-07-01	Into rock crevices	COI	Isognomon bicolor	100	PP906099
8	IB8	a8	Pontamos beach	2021-07-01	Into rock crevices	COI	Isognomon bicolor	99.43	PP906100
9	IL1	b1	Alimia cove	2022-07-01	Under stones	COI	Isognomon legumen	100	PP906088
10	IL2	b2	Alimia cove	2022-07-01	Under stones	COI	Isognomon legumen	100	PP906089
11	IL3	b3	Pontamos beach	2022-07-01	Under stones	COI	Isognomon legumen	100	PP906090
12	IL4	b5	Pontamos beach	2022-07-01	Under stones	COI	Isognomon legumen	100	PP906091
13	IL5	b4	Pontamos beach	2022-07-01	On rocky bottom	COI	Isognomon legumen	100	PP906092
14	IB1	a1	Alimia cove	2022-07-01	Into and around rock crevices	16S	Isognomon bicolor	100	PP908493
15	IB4	a4	Alimia cove	2022-07-01	Into and around rock crevices	16S	Isognomon bicolor	100	PP908494
16	IL2	b2	Alimia cove	2022-07-01	Under stones	16S	Isognomon australicus	100	PP908491
17	IL5	b4	Pontamos beach	2022-07-01	On rocky bottom	16S	Isognomon australicus	100	PP908492
18	IB1	a1	Alimia cove	2022-07-01	Into and around rock crevices	28S	Isognomon bicolor	99.9	PP907946
19	IB4	a4	Alimia cove	2022-07-01	Into and around rock crevices	28S	Isognomon bicolor	99.9	PP907947
20	IL2	b2	Alimia cove	2022-07-01	Under stones	28S	Isognomon legumen	99.9	PP907944
21	IL5	b4	Pontamos beach	2022-07-01	On rocky bottom	28S	Isognomon legumen	99.9	PP907945

## Sheet: Suplementary Table 3
Shell measurements of Isognomon bicolor specimens.
A/A	Locality	TL (cm)	LPL (cm)	HL (cm)	HPT (cm)
IB1	Alimia cove	2.35	1.5	1.2	0.65
IB2	Alimia cove	2.45	1.4	0.9	0.65
IB3	Alimia cove	2.5	1.35	0.9	0.6
IB4	Alimia cove	1.8	1.25	1	0.6
IB5	Alimia cove	2.3	1.45	0.8	0.5
IB6	Alimia cove	2	1.55	1	0.65
IB7	Pontamos beach	1	0.6	0.54	0.3
IB8	Pontamos beach	1.95	1.15	0.9	0.55
TL= total length; LPL= length of pearly layer; HL=hinge length; HPT=hinge point thickness
	measurement index

## Sheet: Suplementary Table 4
Shell measurements of Isognomon legumen specimens.
A/A	Locality	TL (cm)	LPL (cm)	HL (cm)	HPT (cm)
IL1	Alimia cove	3.3	2	1.4	0.55
IL2	Alimia cove	1.6	0.8	0.45	0.25
IL3	Pontamos beach	4	2	1	0.45
IL4	Pontamos beach	4.7	2.4	0.8	0.65
IL5	Pontamos beach	6.8	3.4	1.5	0.9
TL= total length; LPL= length of pearly layer; HL=hinge length; HPT=hinge point thickness
	measurements index
